# Supplementary material
Source: PubMed Central journal article supplement (PMC2718415)
Supplement: supp_172_10_1267__1.pdf [file supp_172_10_1267__1.pdf]

**ONLINE DATA SUPPLEMENT**

**DIAPHRAGM UNLOADING VIA CONTROLLED MECHANICAL VENTILATION  
ALTERS THE GENE EXPRESSION PROFILE**

Keith C. DeRuisseau, R. Andrew Shanely, Nagabhavani Akunuri, Marc T. Hamilton

Darin Van Gammeren, A. Murat Zergeroglu, Michael McKenzie, and Scott K.

Powers

## **Methods**

### **Experimental animals**

These experiments were approved by the University of Florida animal use committee. Healthy, young adult (female, 4-months old) Sprague-Dawley rats were individually housed and fed rat chow and water *ad libitum* and were maintained on a 12 hour light/dark cycle for three weeks prior to initiation of these experiments. To minimize the possible influence of circadian rhythm on gene expression levels, animals were euthanized around the same time ( $\pm 2$  hours) each day (E1).

### **Experimental design**

To examine the time course of MV-induced alterations in diaphragmatic gene expression, animals were randomly assigned to one of three experimental groups: 1) control, 2) 6 hours MV (MV6), and 3) 18 hours MV (MV18).

### **Protocol for control animals**

The animals in the control group were free of intervention prior to measurement of diaphragmatic gene expression. That is, these animals were not mechanically ventilated or exposed to long-term anesthesia prior to study. Animals in the control group received an IP injection of sodium pentobarbital (50 mg/kg body weight). After a surgical plane of anesthesia was achieved, the diaphragm was rapidly removed and segments from the ventral costal region were rapidly frozen in liquid nitrogen and stored at  $-80^{\circ}\text{C}$  for subsequent analysis of gene expression.

### **Protocol for mechanically ventilated animals**

All surgical procedures were performed using aseptic techniques. Animals randomly selected for MV were anesthetized with an IP injection of sodium pentobarbital

(50 mg/kg body weight). After reaching a surgical plane of anesthesia the animals were tracheostomized and mechanically ventilated using a volume-driven small animal ventilator (Harvard Apparatus, Cambridge, MA). The ventilator delivered all breaths; hence, this mode of ventilation (i.e., controlled MV) results in complete diaphragmatic inactivity. The tidal volume was established at approximately 0.55 ml/100 grams of body weight with a respiratory rate of 80 breaths/min. This respiratory rate was selected to mimic the breathing frequency of adult rats at rest. Additionally, positive end-expiratory pressure (PEEP) of 1 cm H<sub>2</sub>O was used throughout the protocol.

An arterial catheter was inserted into the carotid artery for constant measurement of systolic blood pressure, periodic blood sampling for analysis of arterial pH and blood gases, and infusion of isotonic saline. Arterial blood samples (~100 microliters per sample) were removed during the first and last hour of MV and analyzed for arterial PCO<sub>2</sub>, PO<sub>2</sub>, and pH using a blood gas analyzer (Instrumentation Laboratories, model 1610). Prior to analysis, the analyzer was calibrated using standardized gases and pH solutions.

A venous catheter was inserted into the jugular vein to permit the infusion of sodium pentobarbital when necessary. Anesthesia was maintained over the entire period of MV by continuous infusion of sodium pentobarbital (~10 mg/kg/hour). Throughout the experiments, technicians continuously monitored the level of anesthesia in MV animals by several methods (i.e., monitoring blood pressure and corneal/lid reflexes). Body temperature was maintained at ~37°C by use of a re-circulating heating blanket. Additionally, heart rate and electrical activity of the heart were monitored via a lead II ECG using needle electrodes placed subcutaneously.

Throughout MV, animals received enteral nutrition using the AIN-76 rodent diet. This planned feeding schedule was administered to the animals at a rate of 0.5 ml/2 hours. Further, body fluid homeostasis was maintained via the administration of 2.0 ml/kg/hour intravenous electrolyte solution.

Continuing care during MV included expressing the bladder, removing airway mucus, lubricating the eyes, rotating the animal and passive movement of the limbs. This care was maintained throughout the experimental period at hourly intervals. Finally, repeated intramuscular injections of glycopyrrolate (0.04 mg/kg/2 hours) were employed to reduce airway secretions. Upon completion of MV, segments of the costal diaphragm were removed, rapidly frozen in liquid nitrogen and stored at  $-80^{\circ}\text{C}$  for subsequent analysis of gene expression.

## **Molecular Measurements**

### **Isolation of total RNA**

A portion of the costal diaphragm (~60 mg) was homogenized in 1.5 ml of Trizol reagent (Invitrogen, Carlsbad, CA) and processed according to the manufacturer's instructions. Samples were homogenized with a Polytron blade homogenizer at medium speed and centrifuged at  $12,000 \times g$  for 10 minutes ( $4^{\circ}\text{C}$ ) to remove insoluble material. The RNA portion was transferred to a new tube and extracted with 120  $\mu\text{L}$  of bromochloropropane (Sigma, St. Louis, MO). Samples were vortexed briefly and centrifuged at  $13,000 \times g$  for 20 minutes ( $4^{\circ}\text{C}$ ). Following transfer of the aqueous phase to a new tube, RNA was precipitated with one volume of isopropanol and washed twice with two volumes of 75% ethanol. The RNA was pelleted via centrifugation and resuspended in RNase free water (Sigma, St. Louis, MO). Concentration and purity of

the extracted RNA was measured spectrophotometrically at 260 nm and at 280 nm in 1X TE buffer (Promega, Madison, WI). The integrity of the extracted total RNA was verified by gel electrophoresis of 1  $\mu$ g RNA on a 1% agarose ethidium bromide-stained TBE gel. Total RNA was stored at  $-80^{\circ}\text{C}$ .

### **Microarray Processing**

Total RNA was subsequently prepared for hybridization according to the protocols outlined in the GeneChip<sup>®</sup> Expression Analysis Technical Manual (Affymetrix Santa Clara, Ca) as we previously reported (E2). Briefly, 8  $\mu$ g of total RNA was used as template for cDNA synthesis (Superscript III, Life Technologies, Carlsbad, CA), which was primed with a T7-(dT)<sub>24</sub> primer containing a T7 RNA polymerase promoter sequence (Genset Oligos, La Jolla, CA). *In vitro* transcription was performed on the purified cDNA product using biotinylated UTP and CTP (Bioarray High Yield RNA Transcript labeling Kit, Enzo Diagnostics, Farmingdale, NY). Biotinylated cRNA was incubated with a 40 mM Tris-acetate (pH 8.1), 100 mM KOAc, 30 mM MgOAc buffer for 35 min at  $94^{\circ}\text{C}$  in order to obtain fragments of 35-200 bases in length. Rat genomic (U34A) arrays (Affymetrix, Santa Clara, CA) were hybridized for 16 hr at  $45^{\circ}\text{C}$  with 15  $\mu$ g of fragmented cRNA. Arrays were stained with a streptavidin-phycoerythrin conjugate (Molecular Probes, Eugene, OR) and scanned with a GeneArray<sup>™</sup> Scanner (Agilent, Palo Alto, CA). Scans were converted into image files (dat. and cel.) with the Affymetrix Microarray Suite Version 5.0 software. Hybridization and scanning of the arrays was performed in the University of Florida ICBR Microarray Core Facility (Gainesville, FL, USA).

## Microarray Analysis

Microarray images were analyzed using statistically based Affymetrix Microarray Suite 5.0 software (Affymetrix, Santa Clara, CA). Comparison of the hybridization signals from the perfect match (PM) and mismatch (MM) probes was performed for the purpose of removing any nonspecific hybridization from the data analysis. Multiple criteria were applied to determine differential expression between treatments, as discussed in more detail by Bey et al. (E2). Results are reported only for transcripts that passed each of the analytical filters (described below) and therefore displayed the most robust responses to MV. We focus more on results for the fully annotated genes because of less confidence in the identity of expressed sequence tags (ESTs). Published statistical algorithms were used to determine whether a transcript was first detectable in a given sample based upon the 16–20 independent probe pairs for each transcript (E2). A one-sided Wilcoxon's signed rank test (WSR) was applied to the PM and MM intensities of each probe set to determine which genes were expressed above background. This nonparametric test was chosen because it has been shown to be robust, insensitive to outliers, and does not assume a normal data distribution (E2). Genes were reported as significantly expressed above background at  $p \leq 0.04$ . Using this criterion, we found 3,303 transcripts expressed on all arrays in at least one of the three groups, these transcripts were then considered for further statistical analysis. Statistical algorithms based on a WSR test were then used to determine significant differential expression ( $p < 0.001$ ) in comparative analyses between treatment groups. A WSR test was applied to 32–40 probes of each possible comparison. Each MV group was compared with the control group, resulting in twenty-five comparisons for MV6 and

twenty-five for MV18. Furthermore, we used the conservative criteria of at least  $\pm 1.5$ -fold differential expression for 25 out of 25 of the possible comparisons for any given gene to be included. It has been shown previously (E2) that no false calls for differential expression were made when the  $> 1.5$  fold criteria of gene presence was applied to at least 3 arrays per group and in this study we used 5 per group.

In reporting differentially expressed genes we elected to employ a conservative approach to the data analysis in which three criteria for all genes needed to pass. To be included in the statistical analysis: 1) a gene transcript was required to have calls of present for all 5 chips within either the control or one of the two experimental groups. The purpose of this filter was to eliminate from the analysis "noisy" genes that displayed signal values close to background levels; 2) genes needed to be significant at the  $p < 0.001$ ; and 3) only genes displaying at least  $\pm 1.5$ -fold change in either the MV6 or MV18 groups were considered. With this degree of stringency we expect the error rate to be  $< 1.0\%$  (E2).

Gene classifications and descriptions were obtained from several public databases including gene ontology (Amigo; <http://www.godatabase.org/cgi-bin/amigo/go.cgi>), PubMed (<http://www.ncbi.nlm.nih.gov/entrez/query.fcgi>), LocusLink (<http://www.ncbi.nlm.nih.gov/projects/LocusLink/>), Rat Genome Database (<http://www.rgd.mcg.edu/>), OMIM (<http://www.ncbi.nlm.nih.gov/entrez/query.fcgi?db=OMIM>), and NetAffx (<https://www.affymetrix.com/analysis/netaffx/index.affx>).

## **Reverse transcription and cDNA quantification for real-time PCR**

Reverse transcription was performed using the Superscript III First-Strand Synthesis System for RT-PCR (Life technologies, Carlsbad, CA) according to the manufacturer's instructions. Reactions were carried out using 5  $\mu$ g of total RNA and 2.5  $\mu$ M oligo(dT)<sub>20</sub> primers. First strand cDNA was subsequently treated with 2 units of RNase H. Following the addition of 2  $\mu$ L of GlycoBlue coprecipitant (Ambion, Austin, TX) to the RT product (21  $\mu$ L), first strand cDNA was purified of RNA and unincorporated nucleotides by treatment with an RNase cocktail (Ambion, Austin, TX), brought to a volume of 100  $\mu$ L with water, and applied to a NucAway spin column (Ambion, Austin, TX). Samples were then mixed with phenol:chloroform:isoamyl alcohol (pH=7.9) and the aqueous phase recovered using a 1.5 mL heavy phase lock gel (Eppendorf, Hamburg, Germany). The cDNA was precipitated by adding one volume of 5.0 M NH<sub>2</sub>OAc and two volumes of 100% ethanol and stored at -20°C overnight. Following centrifugation at 13,000 x g for 20 minutes (4°C) the cDNA was washed with two volumes of 75% ethanol, centrifuged at 13,000 x g for 10 minutes (4°C) and resuspended in 50  $\mu$ L of 1X Tris-EDTA buffer. The cDNA was subsequently quantified using the Oligreen ssDNA Quantitation Reagent Kit according to the manufacturer's instructions (Molecular Probes, Eugene, OR).

## **Quantitative real-time PCR**

Quantitative real-time PCR was performed using the ABI Prism 7000 Sequence Detection System (ABI, Foster City, CA). The probes for all genes consisted of Taqman 5' labeled FAM reporters and 3' non-fluorescent quenchers. Primers and probes for Gadd45 $\alpha$  (GenBank mRNA; L32591), and thioredoxin reductase-1 (TxnRd1) (GenBank



mRNA; AF108213, U63923, AF220760) were obtained from ABI (Assays-on-Demand). The sequences used by the manufacturer in the design of primers and probes from this service are proprietary and are therefore not reported. The hypoxanthine guanine phosphoribosyl transferase (HPRT) primers and probe were obtained from ABI (Assays-by-Design). Primer and probe sequences for the HPRT gene are as follows: Forward, 5'-GTTGGATACAGGCCAGACTTTGT-3'; Reverse, 5'-AGTCAAGGGCATATCCAACAACAA-3'; Probe, 5'-ACTTGTCTGGAATTTCA-3'. Each 25  $\mu$ L PCR reaction, performed in duplicate, contained 3.0 ng of cDNA template. Gene expression was calculated using the relative standard curve method as described in the ABI User Bulletin #2. HPRT was selected as the appropriate normalizer since the expression of this gene in the diaphragm is not significantly altered by mechanical ventilation ( $p = 0.76$ ) (E3).

## References

- E1. Holzberg, D., and U. Albrecht. 2003. The circadian clock: a manager of biochemical processes within the organism. *J Neuroendocrinol* 15(4):339-43.
- E2. Bey, L., N. Akunuri, P. Zhao, E. P. Hoffman, D. G. Hamilton, and M. T. Hamilton. 2003. Patterns of global gene expression in rat skeletal muscle during unloading and low-intensity ambulatory activity. *Physiol Genomics* 13(2):157-67.
- E3. Shanely, R. A., D. Van Gammeren, K. C. DeRuisseau, A. M. Zergeroglu, M. J. McKenzie, K. E. Yarasheski, and S. K. Powers. 2004. Mechanical Ventilation Depresses Protein Synthesis in the Rat Diaphragm. *Am. J. Respir. Crit. Care Med* 170(4):994-9.

**Table E1.** Expression of transport genes in the diaphragm following MV6 and MV18.

| Affymetrix Probe | MV6/Control |      | MV18/Control |       | Gene                                                                                             | Description                                         |
|------------------|-------------|------|--------------|-------|--------------------------------------------------------------------------------------------------|-----------------------------------------------------|
|                  | p-value     | Fold | p-value      | Fold  |                                                                                                  |                                                     |
| <i>Transport</i> |             |      |              |       |                                                                                                  |                                                     |
| AF047707_at      | 1.09E-02    | 2.2  | 3.94E-04     | 4.1   | UDP-glucose:ceramide glycosyltransferase                                                         | carbohydrate transport                              |
| X66494_at        | 2.77E-02    | -1.3 | 1.25E-04     | -1.8  | choline transporter                                                                              | choline transporter                                 |
| D50436_at        | 1.68E-01    | -0.7 | 2.57E-05     | -2.0  | ferredoxin 1                                                                                     | electron transport                                  |
| AF007107_s_at    | 6.94E-01    | -0.5 | 9.35E-05     | -2.6  | cytochrome b5                                                                                    | electron transport                                  |
| AF080468_g_at    | 1.03E-02    | -1.7 | 2.24E-06     | -2.8  | glucose-6-phosphatase, transport protein 1                                                       | endoplasmic reticulum glucose-6-phosphate transport |
| AF080468_at      | 1.52E-02    | -1.4 | 3.50E-07     | -2.6  | glucose-6-phosphatase, transport protein 1                                                       | endoplasmic reticulum glucose-6-phosphate transport |
| D14048_g_at      | 6.63E-01    | 0.3  | 9.96E-05     | 2.1   | transporter protein; system N1 Na <sup>+</sup> and H <sup>+</sup> -coupled glutamine transporter | glutamine transport                                 |
| AB006450_at      | 2.05E-01    | -0.8 | 1.53E-07     | -2.5  | translocator of inner mitochondrial membrane 17a (yeast)                                         | intracellular protein transport                     |
| AF022774_g_at    | 1.74E-01    | -0.6 | 3.65E-04     | -1.7  | rabphilin 3A-like (without C2 domains)                                                           | intracellular protein transport                     |
| L12383_at        | 6.99E-01    | -0.3 | 1.52E-04     | 1.7   | ADP-ribosylation factor 4                                                                        | intracellular protein transport                     |
| rc_AI007857_at   | 6.04E-01    | -0.3 | 9.32E-04     | 1.6   | HGF-regulated tyrosine kinase substrate                                                          | intracellular protein transport                     |
| D17445_g_at      | 7.25E-01    | -0.1 | 1.30E-05     | 1.5   | tyrosine 3-monooxygenase/tryptophan 5-monooxygenase activation protein, eta polypeptide          | intracellular protein transport                     |
| rc_AA944324_at   | 3.61E-02    | 1.2  | 5.15E-04     | 1.6   | ADP-ribosylation factor 6                                                                        | intracellular protein transport                     |
| rc_AA799645_g_at | 3.48E-02    | -1.5 | 1.33E-06     | -2.1  | FXYP domain-containing ion transport regulator 1                                                 | membrane ion transport                              |
| rc_AA799645_at   | 3.00E-02    | -1.3 | 1.33E-06     | -2.0  | FXYP domain-containing ion transport regulator 1                                                 | membrane ion transport                              |
| U14007_at        | 6.18E-03    | -2.1 | 7.41E-04     | -3.6  | aquaporin 4                                                                                      | membrane water channel                              |
| AB000507_at      | 1.24E-01    | -0.5 | 6.33E-05     | -2.1  | aquaporin 7                                                                                      | membrane water channel                              |
| AF093139_s_at    | 2.00E-02    | 1.3  | 1.26E-04     | 1.8   | nuclear RNA export factor 1 homolog (S. cerevisiae)                                              | mRNA-nucleus export                                 |
| AB015432_s_at    | 2.89E-02    | 1.4  | 1.38E-04     | 1.9   | tumor-associated protein 1                                                                       | neutral amino acid transporter                      |
| rc_AA875099_s_at | 2.44E-01    | 1.1  | 4.08E-05     | 1.9   | nuclear pore associated protein                                                                  | nuclear protein export                              |
| AF015304_at      | 1.60E-03    | -1.4 | 8.51E-05     | -2.3  | solute carrier family 29, member 1                                                               | nucleoside transport                                |
| D86039_at        | 4.88E-01    | -0.6 | 8.12E-04     | -2.2  | potassium inwardly rectifying channel, subfamily J,                                              | potassium ion transport                             |
| M94287_at        | 1.53E-01    | 1.2  | 8.89E-04     | 1.5   | nucleolar phosphoprotein p130                                                                    | protein-nucleolus import                            |
| rc_AI230614_s_at | 2.35E-03    | -2.0 | 7.07E-05     | -2.9  | ATPase Na <sup>+</sup> /K <sup>+</sup> transporting beta 1 polypeptide                           | sodium/potassium-exchanging ATPase                  |
| rc_AI112173_at   | 1.66E-02    | -1.7 | 2.04E-05     | -2.7  | ATPase Na <sup>+</sup> /K <sup>+</sup> transporting beta 1 polypeptide                           | sodium/potassium-exchanging ATPase                  |
| D84450_at        | 1.75E-01    | 0.8  | 1.49E-04     | 1.7   | ATPase, Na <sup>+</sup> /K <sup>+</sup> transporting, beta 3 polypeptide                         | sodium/potassium-exchanging ATPase                  |
| rc_AA859652_at   | 7.94E-01    | -0.7 | 5.47E-04     | -2.1  | solute carrier family 16 (monocarboxylic acid transporters), member 6                            | unknown                                             |
| D17521_at        | 1.58E-01    | -0.7 | 2.74E-06     | -1.9  | protein kinase C-regulated chloride channel                                                      | voltage-gated chloride channel                      |
| Y16774_at        | 9.42E-01    | 0.4  | 2.89E-04     | 1.8   | Dri 27/ZnT4 protein                                                                              | zinc ion transport                                  |
| M22253_at        | 2.08E-02    | -3.7 | 7.45E-04     | -32.9 | sodium channel, voltage-gated, type 1, alpha polypeptide                                         | sodium ion transport                                |

**Table E2.** Expression of regulation of transcription and structural protein genes in the diaphragm following MV6 and MV18.

| Affymetrix Probe                   | MV6/Control |      | MV18/Control |      | Gene                                                                    | Description                                            |
|------------------------------------|-------------|------|--------------|------|-------------------------------------------------------------------------|--------------------------------------------------------|
|                                    | p-value     | Fold | p-value      | Fold |                                                                         |                                                        |
| <b>Regulation of Transcription</b> |             |      |              |      |                                                                         |                                                        |
| X60769mRNA_at                      | 3.40E-03    | 1.5  | 1.75E-04     | 2.2  | CCAAT/enhancer binding protein (C/EBP), beta                            | acute phase response                                   |
| L35271_at                          | 1.58E-01    | 1.9  | 2.93E-06     | 4.1  | runt related transcription factor 1                                     | development                                            |
| U04835_at                          | 2.77E-01    | 1.0  | 7.93E-04     | 2.8  | cAMP responsive element modulator (delta)                               | down-regulator of cAMP-induced transcription           |
| D86745cds_s_at                     | 8.07E-03    | -1.0 | 7.52E-05     | -2.0 | nuclear receptor subfamily 0, group B, member 2                         | ligand-dependent nuclear receptor                      |
| M27151_at                          | 1.45E-01    | 1.5  | 6.45E-04     | 2.7  | myogenic factor 6                                                       | muscle development                                     |
| M24393_at                          | 1.46E-01    | 3.1  | 8.61E-05     | 6.4  | myogenin                                                                | muscle development                                     |
| Y00396mRNA_g_at                    | 1.04E-03    | 3.4  | 1.06E-04     | 9.9  | c-myc                                                                   | proto-oncogene                                         |
| Y00396mRNA_at                      | 8.48E-03    | 17.5 | 2.82E-04     | 54.5 | c-myc                                                                   | proto-oncogene                                         |
| rc_AI136891_at                     | 1.24E-03    | 1.5  | 6.76E-04     | 1.7  | zinc finger protein 36, C3H type-like 1                                 | regulates response to growth factors                   |
| U53184_at                          | 4.44E-03    | 2.7  | 8.73E-06     | 5.7  | LPS-induced TNF-alpha factor                                            | regulation of TNF-Alpha                                |
| AF016387_g_at                      | 1.62E-02    | -1.9 | 2.17E-05     | -3.1 | retinoid X receptor gamma                                               | retinoic acid response pathway                         |
| M36074_at                          | 1.16E-02    | -1.3 | 1.75E-05     | -2.8 | nuclear receptor subfamily 3, group C, member 2                         | sodium ion homeostasis                                 |
| rc_AA875121_at                     | 4.05E-03    | -1.2 | 3.58E-04     | -1.5 | nuclear transcription factor-Y gamma                                    | transcriptional activation of various genes            |
| L23148_g_at                        | 1.04E-04    | -2.5 | 2.15E-03     | -2.6 | Inhibitor of DNA binding 1, helix-loop-helix protein (splice variation) | transcriptional repressor                              |
| L25785_at                          | 5.74E-02    | 1.9  | 1.23E-05     | 3.4  | transforming growth factor beta 1 induced transcript 4                  | transcriptional repressor                              |
| rc_AA866257_at                     | 2.48E-02    | -0.8 | 2.82E-05     | -1.9 | cytosolic leucine-rich protein                                          | tumor suppressor                                       |
| U50736_s_at                        | 6.65E-02    | 16.8 | 1.91E-06     | 56.5 | ankyrin-like repeat protein                                             | negative regulator of cardiac-specific gene expression |
| <b>Structural Proteins</b>         |             |      |              |      |                                                                         |                                                        |
| rc_AI169370_at                     | 2.89E-01    | 0.9  | 9.12E-04     | 2.2  | alpha-tubulin                                                           | microtubule component                                  |
| X74800_at                          | 4.02E-01    | -0.8 | 2.33E-04     | -1.6 | unconventional myosin Myr2 I heavy chain                                | contractile apparatus                                  |
| X80130cds_f_at                     | 1.90E-01    | 0.0  | 5.40E-04     | -1.5 | alpha actin, cardiac                                                    | contractile apparatus                                  |
| rc_AI227608_s_at                   | 9.97E-03    | -1.6 | 3.45E-05     | -2.3 | microtubule-associated protein tau                                      | cytoskeleton                                           |
| U05784_s_at                        | 4.59E-06    | 1.7  | 9.04E-04     | 2.1  | microtubule-associated proteins 1A/1B light chain 3                     | cytoskeleton                                           |
| rc_AI104707_at                     | 2.28E-03    | -1.6 | 3.45E-05     | -1.7 | caveolin 3                                                              | endocytosis                                            |
| Z46614cds_at                       | 1.67E-03    | -1.6 | 9.74E-04     | -2.1 | caveolin                                                                | endocytosis                                            |
| rc_AI043968_g_at                   | 5.89E-02    | -1.2 | 5.07E-04     | -2.1 | caveolin 3                                                              | endocytosis                                            |
| J04993_at                          | 2.61E-01    | -0.5 | 2.42E-04     | -1.7 | Troponin I, slow isoform                                                | contractile apparatus                                  |
| U48288_at                          | 4.99E-01    | -0.1 | 1.53E-04     | 1.6  | A-kinase anchoring protein 11                                           | mitochondria anchoring protein                         |

**Table E3.** Expression of metal binding protein, nucleic acid/nucleotide metabolism, inflammatory response, and neuronal factor genes in the diaphragm following MV6 and MV18.

| Affymetrix Probe                          | MV6/Control |      | MV18/Control |       | Gene                                                            | Description                                                   |
|-------------------------------------------|-------------|------|--------------|-------|-----------------------------------------------------------------|---------------------------------------------------------------|
|                                           | p-value     | Fold | p-value      | Fold  |                                                                 |                                                               |
| <b>Metal binding Proteins</b>             |             |      |              |       |                                                                 |                                                               |
| rc_AA900516_s_at                          | 2.19E-02    | -2.5 | 2.09E-04     | -4.0  | peptidyl arginine deiminase, type 2                             | calcium dependent deimination of protein arginine residues    |
| rc_AI231807_at                            | 3.33E-01    | 1.1  | 6.16E-05     | 3.2   | ferritin light chain 1                                          | trace metal metabolism                                        |
| rc_AI231807_g_at                          | 2.96E-01    | 1.5  | 2.27E-04     | 3.7   | ferritin light chain 1                                          | trace metal metabolism                                        |
| AJ000347_g_at                             | 1.58E-01    | -0.7 | 2.75E-05     | -2.5  | 3(2),5-bisphosphate nucleotidase                                | magnesium-dependent inositol/phosphatidylinositol phosphatase |
| rc_AI172247_at                            | 4.82E-05    | 2.5  | 1.48E-02     | 2.2   | xanthine dehydrogenase                                          | purine metabolism                                             |
| J03572_i_at                               | 9.55E-02    | -1.0 | 7.97E-04     | -1.8  | alkaline phosphatase                                            | skeletal mineralization                                       |
| <b>Nucleic Acid/Nucleotide Metabolism</b> |             |      |              |       |                                                                 |                                                               |
| AJ011606_at                               | 2.24E-01    | -0.7 | 6.23E-04     | -2.5  | DNA polymerase alpha subunit II                                 | DNA replication                                               |
| AF044910_g_at                             | 8.76E-01    | 0.3  | 6.54E-04     | 1.7   | survival motor neuron                                           | mRNA processing                                               |
| rc_AI104524_s_at                          | 1.50E-01    | 0.8  | 9.99E-06     | 1.9   | heterogeneous nuclear ribonucleoprotein A/B                     | mRNA processing                                               |
| AF044910_at                               | 2.25E-02    | 1.3  | 6.61E-05     | 2.1   | survival motor neuron                                           | mRNA processing                                               |
| M29293_at                                 | 2.71E-01    | -0.6 | 8.48E-04     | -1.6  | small nuclear ribonucleoparticle-associated protein, clone Sm51 | mRNA splicing                                                 |
| X73411mRNA_s_at                           | 4.54E-01    | 0.1  | 4.29E-04     | -2.3  | snRNP-associated polypeptide N                                  | mRNA splicing                                                 |
| AF036335_at                               | 3.16E-01    | 0.5  | 3.58E-05     | 2.1   | NonO/p54nrb homolog                                             | mRNA splicing                                                 |
| AB022209_s_at                             | 1.96E-01    | 1.1  | 2.97E-04     | 2.1   | ribonucleoprotein F                                             | mRNA splicing                                                 |
| AA848218_at                               | 8.90E-02    | 1.2  | 5.19E-04     | 1.7   | DNA topoisomerase I                                             | DNA supercoiling                                              |
| J03969_at                                 | 3.23E-01    | 0.6  | 1.02E-04     | 1.8   | nucleophosmin 1                                                 | ribosome assembly                                             |
| J04943_at                                 | 3.61E-01    | 1.1  | 6.00E-04     | 3.1   | nucleophosmin 1                                                 | ribosome assembly                                             |
| AF063447_at                               | 2.08E-01    | 0.8  | 2.39E-06     | 2.3   | nuclear RNA helicase, DECD                                      | mRNA processing                                               |
| rc_AA892562_g_at                          | 4.48E-01    | -0.2 | 9.29E-05     | 1.8   | dyskeratosis congenita 1, dyskerin                              | rRNA processing                                               |
| rc_AA892562_at                            | 4.30E-01    | 0.8  | 3.25E-04     | 2.1   | dyskeratosis congenita 1, dyskerin                              | rRNA processing                                               |
| M55015cnds_s_at                           | 1.99E-01    | 1.0  | 1.30E-06     | 2.1   | nucleolin                                                       | synthesis of ribosomes                                        |
| U90888_at                                 | 2.89E-01    | 3.1  | 4.35E-04     | 5.3   | adenosine monophosphate deaminase 3                             | purine ribonucleoside monophosphate biosynthesis              |
| <b>Inflammatory Response</b>              |             |      |              |       |                                                                 |                                                               |
| U49062_g_at                               | 4.08E-01    | 0.8  | 5.54E-04     | 3.7   | CD24 antigen                                                    | cell adhesion                                                 |
| U49062_at                                 | 3.79E-01    | 1.0  | 6.05E-05     | 3.2   | CD24 antigen                                                    | cell adhesion                                                 |
| rc_AI171462_s_at                          | 1.13E-01    | 1.6  | 9.13E-04     | 3.8   | CD24 antigen                                                    | cell adhesion                                                 |
| AF039583_s_at                             | 3.12E-04    | -5.7 | 1.07E-04     | -18.8 | decay-accelerating factor                                       | complement activation                                         |
| <b>Neuronal Factors</b>                   |             |      |              |       |                                                                 |                                                               |
| S55427_s_at                               | 4.94E-04    | -1.6 | 3.00E-03     | -1.3  | peripheral myelin protein 22                                    | cell cycle arrest                                             |
| D88250_at                                 | 2.57E-01    | 1.2  | 1.52E-04     | 2.2   | complement component 1                                          | glial cell differentiation                                    |
| AB007689_at                               | 6.85E-01    | -0.1 | 1.93E-04     | -1.9  | homer, neuronal immediate early gene, 2                         | metabotropic glutamate receptor signaling                     |
| AF016296_at                               | 8.69E-04    | -1.9 | 2.01E-03     | -1.7  | neuropilin                                                      | neurogenesis                                                  |
| X59267_at                                 | 3.62E-03    | -0.9 | 8.47E-05     | -1.6  | drebrin 1                                                       | neurogenesis                                                  |
| AA801441_at                               | 6.97E-02    | 1.3  | 1.14E-07     | 2.0   | platelet-activating factor acetylhydrolase beta subunit         | neurogenesis                                                  |
| S50879_g_at                               | 6.77E-03    | -1.4 | 7.97E-05     | -2.4  | acetylcholinesterase                                            | neurotransmitter catabolism                                   |

**Table E4.** Expression of miscellaneous and unknown function genes in the diaphragm following MV6 and MV18.

| Affymetrix Probe        | MV6/Control |      | MV18/Control |       | Gene                                                                   | Description                       |
|-------------------------|-------------|------|--------------|-------|------------------------------------------------------------------------|-----------------------------------|
|                         | p-value     | Fold | p-value      | Fold  |                                                                        |                                   |
| <b>Miscellaneous</b>    |             |      |              |       |                                                                        |                                   |
| rc_AA874874_at          | 4.30E-02    | -1.0 | 3.16E-04     | -1.6  | alcohol dehydrogenase 4 (class II), pi polypeptide                     | ethanol oxidation                 |
| rc_AA892821_at          | 3.12E-03    | -0.9 | 9.12E-04     | -1.5  | aldo-keto reductase family 7, member A2 (aflatoxin aldehyde reductase) | aldehyde metabolism               |
| rc_AI171959_at          | 8.16E-03    | -2.6 | 5.87E-06     | -13.6 | neuraminidase 2                                                        | hydrolyzes sialylated compounds   |
| AF087431_g_at           | 2.92E-01    | 0.9  | 7.45E-05     | 1.8   | glucosidase 1                                                          | N-linked glycoprotein processing  |
| AF049344_at             | 4.85E-03    | -1.0 | 5.56E-05     | -1.6  | UDP-GalNAc:polypeptide N-acetylgalactosaminyltransferase T5            | O-linked glycosylation            |
| D10587_g_at             | 1.54E-01    | 2.0  | 4.05E-04     | 3.2   | 85kDa sialoglycoprotein                                                | lysosomal membrane                |
| L12025_at               | 1.84E-01    | 5.2  | 3.92E-04     | 13.7  | tumor-associated antigen 1                                             | virus entry                       |
| D13623_g_at             | 1.03E-01    | 1.3  | 8.85E-05     | 2.3   | P34 protein                                                            | membrane ribosome binding protein |
| D30649mRNA_s_at         | 1.65E-01    | 4.4  | 4.96E-05     | 11.1  | alkaline phosphodiesterase                                             | skeletal mineralization           |
| D42137exon_s_at         | 2.83E-02    | -1.1 | 9.35E-04     | -1.7  | annexin V                                                              | blood coagulation                 |
| AF090867_at             | 2.91E-01    | -0.8 | 1.13E-04     | -2.5  | guanosine monophosphate reductase                                      | response to cold                  |
| AF090867_g_at           | 4.50E-01    | -0.8 | 4.23E-06     | -2.4  | guanosine monophosphate reductase                                      | response to cold                  |
| <b>Unknown Function</b> |             |      |              |       |                                                                        |                                   |
| U95161_s_at             | 5.02E-02    | -1.3 | 3.52E-05     | -2.0  | nuclear protein E3-3                                                   |                                   |
| X62660mRNA_g_at         | 5.28E-02    | -1.2 | 5.28E-05     | -1.8  | LRRGT00083 mRNA                                                        |                                   |
| rc_AA893338_at          | 3.67E-02    | -1.0 | 8.54E-04     | -1.9  | hypothetical RNA binding protein RDA288                                |                                   |
| AF095741_g_at           | 1.07E-01    | -1.0 | 6.41E-04     | -1.8  | Mg87 protein                                                           |                                   |
| rc_AA891824_at          | 4.03E-02    | -1.0 | 1.87E-04     | -1.9  | Rattus norvegicus clone ZG52 mRNA sequence                             |                                   |
| S72637_s_at             | 6.80E-02    | -1.0 | 3.71E-04     | -2.0  | tumor-suppressive gene                                                 |                                   |
| X76453_at               | 3.57E-02    | -0.8 | 3.63E-06     | -1.7  | HRAS like suppressor                                                   |                                   |
| S45663_g_at             | 3.28E-01    | -0.5 | 4.52E-05     | -1.8  | synaptic glycoprotein SC2                                              |                                   |
| S45663_at               | 3.28E-01    | -0.5 | 3.04E-05     | -2.1  | synaptic glycoprotein SC2                                              |                                   |
| M13011cds_at            | 9.22E-01    | -0.3 | 8.30E-04     | -1.5  | c-ras-H-1                                                              |                                   |
| X89225cds_s_at          | 1.86E-01    | 1.1  | 1.73E-04     | 2.3   | protein linked to system L-like neutral amino acid transport           |                                   |
| rc_AI071866_s_at        | 2.26E-01    | 1.2  | 9.89E-05     | 3.1   | Rattus norvegicus Nclone10 mRNA                                        |                                   |
| U92081mRNA_s_at         | 2.47E-01    | 1.2  | 5.01E-05     | 3.5   | epithelial cell transmembrane protein antigen precursor (RT140)        |                                   |

**Table E5.** Expression of growth and/or maintenance, and apoptosis genes in the diaphragm following MV6 and MV18.

| Affymetrix Probe                      | MV6/Control |      | MV18/Control |      | Gene                                                                       | Description                                  |
|---------------------------------------|-------------|------|--------------|------|----------------------------------------------------------------------------|----------------------------------------------|
|                                       | p-value     | Fold | p-value      | Fold |                                                                            |                                              |
| <b>Cell Growth and/or Maintenance</b> |             |      |              |      |                                                                            |                                              |
| M24067_at                             | 3.20E-02    | 4.6  | 2.20E-04     | 20.6 | serine (or cysteine) proteinase inhibitor, member 1                        | angiogenesis                                 |
| L20913_s_at                           | 1.04E-01    | -0.9 | 3.34E-04     | -1.6 | vascular endothelial growth factor                                         | angiogenesis                                 |
| AF022952_at                           | 5.59E-01    | 0.3  | 2.36E-05     | -2.0 | vascular endothelial growth factor B                                       | angiogenesis                                 |
| rc_AA892598_g_at                      | 6.14E-02    | 2.0  | 2.25E-06     | 3.6  | nucleostemin                                                               | cell proliferation                           |
| rc_AA892598_at                        | 1.26E-01    | 2.2  | 5.26E-06     | 3.6  | nucleostemin                                                               | cell proliferation                           |
| rc_AA859920_at                        | 1.29E-01    | 0.9  | 2.84E-05     | 1.8  | nucleosome assembly protein 1-like 1                                       | DNA replication                              |
| AF062594_at                           | 2.25E-01    | 0.9  | 7.77E-05     | 1.8  | nucleosome assembly protein 1-like 1                                       | DNA replication                              |
| AF062594_g_at                         | 2.03E-01    | 1.1  | 4.83E-04     | 1.9  | nucleosome assembly protein 1-like 1                                       | DNA replication                              |
| M24604_g_at                           | 1.76E-01    | 1.4  | 3.02E-06     | 2.6  | proliferating cell nuclear antigen                                         | DNA replication                              |
| M24604_at                             | 1.77E-01    | 1.5  | 1.37E-08     | 2.8  | proliferating cell nuclear antigen                                         | DNA replication                              |
| U77829mRNA_i_at                       | 2.24E-02    | 2.0  | 1.97E-05     | 3.9  | Rattus norvegicus gas-5 growth arrest homolog non-translated mRNA sequence | growth arrest                                |
| U77829mRNA_s_at                       | 3.51E-02    | 2.4  | 3.36E-05     | 5.3  | Rattus norvegicus gas-5 growth arrest homolog non-translated mRNA sequence | growth arrest                                |
| rc_AI232078_at                        | 8.71E-01    | -0.4 | 6.11E-04     | 2.6  | LanC (bacterial lantibiotic synthetase component C)-like 1                 | growth factor binding                        |
| rc_AI014163_at                        | 1.84E-02    | 1.8  | 3.30E-05     | 3.1  | interferon-related developmental regulator 1                               | muscle differentiation                       |
| L26268_g_at                           | 4.78E-02    | 1.2  | 8.83E-04     | 2.7  | B-cell translocation gene 1                                                | cell proliferation                           |
| L26268_at                             | 4.55E-03    | 1.7  | 3.34E-04     | 3.0  | B-cell translocation gene 1                                                | cell proliferation                           |
| rc_AA818593_g_at                      | 2.71E-01    | 1.0  | 3.65E-04     | 2.4  | phosphatidate phosphohydrolase type 2a                                     | phospholipid degradation                     |
| Z83757mRNA_at                         | 1.86E-01    | -1.0 | 1.76E-05     | -3.2 | growth hormone receptor                                                    | cell differentiation                         |
| Z83757mRNA_g_at                       | 6.64E-01    | -0.9 | 2.26E-04     | -3.8 | growth hormone receptor                                                    | cell differentiation                         |
| rc_AI103957_g_at                      | 2.92E-04    | -1.4 | 1.95E-05     | -1.9 | CD 81 antigen                                                              | cell proliferation                           |
| AF037272_at                           | 3.40E-02    | -5.6 | 3.06E-06     | -9.8 | wap four-disulfide core domain 1                                           | serine-type endopeptidase inhibitor activity |
| X61654_at                             | 4.99E-02    | 1.3  | 9.95E-05     | 2.0  | CD63 antigen                                                               | tumor progression                            |
| L13619_g_at                           | 3.47E-02    | 1.5  | 5.39E-04     | 4.8  | growth response protein (CL-6)                                             | unknown                                      |
| L13619_at                             | 4.05E-02    | 2.3  | 1.11E-04     | 4.7  | growth response protein (CL-6)                                             | unknown                                      |
| U31203_at                             | 1.22E-02    | 1.7  | 8.43E-04     | 2.7  | noggin                                                                     | skeletal and CNS development                 |
| <b>Apoptosis</b>                      |             |      |              |      |                                                                            |                                              |
| rc_AA874794_g_at                      | 1.77E-03    | -1.5 | 1.63E-04     | -2.0 | nerve growth factor receptor associated protein 1                          | caspase activation                           |
| S76511_s_at                           | 1.88E-01    | 1.2  | 5.55E-05     | 1.8  | Bcl2-associated X protein (Bax)                                            | caspase activation                           |
| M86564_at                             | 9.04E-01    | -0.4 | 3.99E-04     | 1.9  | alpha-prothymosin                                                          | caspase inhibition                           |
| M64733Mma_s_at                        | 2.11E-02    | 1.8  | 2.49E-04     | 2.4  | clusterin                                                                  | unknown                                      |

**Table E6.** Expression of signal transduction genes following MV6 and MV18.

| Affymetrix Probe           | MV6/Control |      | MV18/Control |      | Gene                                                                                     | Description                                                   |
|----------------------------|-------------|------|--------------|------|------------------------------------------------------------------------------------------|---------------------------------------------------------------|
|                            | p-value     | Fold | p-value      | Fold |                                                                                          |                                                               |
| <b>Signal Transduction</b> |             |      |              |      |                                                                                          |                                                               |
| rc_AI176689_at             | 9.15E-01    | -0.2 | 7.85E-04     | -2.8 | mitogen-activated pkk 6                                                                  | activator of p38 MAPK                                         |
| X58828_at                  | 1.30E-01    | 1.2  | 9.87E-04     | 2.6  | protein tyrosine phosphatase, non-receptor type 2                                        | amino acid dephosphorylation                                  |
| rc_AA893743_at             | 1.72E-02    | -1.2 | 3.25E-04     | -1.7 | protein kinase inhibitor, alpha                                                          | cAMP-dependent protein kinase inhibitor                       |
| rc_AA893743_g_at           | 6.18E-02    | -1.0 | 6.36E-06     | -1.6 | protein kinase inhibitor, alpha                                                          | cAMP-dependent protein kinase inhibitor                       |
| U78517_at                  | 3.10E-01    | -0.6 | 5.42E-04     | -2.1 | cAMP-regulated guanine nucleotide exchange factor II                                     | cAMP-dependent protein kinase regulator                       |
| rc_AA892417_at             | 3.69E-02    | 1.5  | 3.49E-05     | 2.7  | ephrin A1                                                                                | cell-cell signaling                                           |
| rc_AI232374_at             | 1.80E-02    | -1.4 | 2.55E-05     | -2.2 | H1 histone family, member 0                                                              | chromosome organization                                       |
| rc_AI232374_g_at           | 9.51E-02    | -1.2 | 4.00E-04     | -2.6 | H1 histone family, member 0                                                              | chromosome organization                                       |
| rc_AI177503_at             | 5.14E-01    | 0.6  | 1.39E-04     | 1.9  | H3 histone, family 3B                                                                    | chromosome organization                                       |
| rc_AA875172_at             | 3.39E-01    | -0.6 | 2.43E-06     | -2.5 | SH3-domain kinase binding protein 1                                                      | endocytosis                                                   |
| rc_AI104012_g_at           | 2.31E-01    | 0.8  | 5.19E-05     | 2.1  | dual-specificity tyrosine-(Y)-phosphorylation regulated kinase 1A                        | endocytosis                                                   |
| U16655_at                  | 8.53E-02    | -2.2 | 2.31E-04     | -3.1 | phospholipase C, delta 4                                                                 | generation of inositol 1,4,5-trisphosphate and diacylglycerol |
| U90312_at                  | 5.50E-04    | -1.4 | 7.80E-07     | -3.1 | synaptojanin 2                                                                           | inositol/phosphatidylinositol phosphatase                     |
| D90401_g_at                | 8.08E-01    | 0.2  | 1.52E-04     | -1.6 | Afadin                                                                                   | intercellular junction                                        |
| S74351_s_at                | 2.63E-05    | -7.2 | 2.06E-03     | -5.5 | protein tyrosine phosphatase, non-receptor type 16                                       | MAP kinase phosphatase                                        |
| U02553cds_s_at             | 5.73E-04    | -3.3 | 6.87E-03     | -3.1 | protein tyrosine phosphatase, non-receptor type 16                                       | MAP kinase phosphatase                                        |
| S81478_s_at                | 6.18E-04    | -2.6 | 1.28E-02     | -2.4 | protein tyrosine phosphatase, non-receptor type 16                                       | MAP kinase phosphatase                                        |
| L27843_s_at                | 3.50E-02    | 1.5  | 1.13E-07     | 2.6  | protein tyrosine phosphatase 4a1                                                         | nuclear protein tyrosine phosphatase                          |
| AF012714_at                | 3.94E-01    | 0.3  | 2.00E-04     | 1.7  | multiple inositol polyphosphate histidine phosphatase 1                                  | phosphoinositide-mediated signaling                           |
| AJ001320_at                | 1.87E-01    | -1.2 | 5.75E-06     | -2.0 | multiple PDZ domain protein                                                              | protein binding                                               |
| D78588_at                  | 8.15E-04    | -1.9 | 5.83E-05     | -3.1 | diacylglycerol kinase zeta                                                               | protein kinase C activation                                   |
| rc_AI137862_s_at           | 7.73E-03    | 1.7  | 9.55E-04     | 2.4  | P38 alpha                                                                                | protein kinase cascade                                        |
| rc_AI171630_s_at           | 2.37E-05    | 2.6  | 1.09E-06     | 4.3  | P38 alpha                                                                                | protein kinase cascade                                        |
| U73142_g_at                | 7.30E-04    | 2.6  | 6.66E-07     | 4.6  | P38 alpha                                                                                | protein kinase cascade                                        |
| U73142_at                  | 4.82E-03    | 3.0  | 6.50E-04     | 4.2  | P38 alpha                                                                                | protein kinase cascade                                        |
| L15619_at                  | 1.66E-01    | 0.9  | 3.74E-04     | 1.7  | casein kinase II beta subunit                                                            | protein kinase CK2 complex                                    |
| rc_AI230632_at             | 7.49E-02    | 1.3  | 6.11E-06     | 1.7  | P21 (CDKN1A)-activated kinase 2                                                          | protein serine-threonine kinase                               |
| rc_AI180424_at             | 9.87E-01    | 0.0  | 6.02E-05     | 2.1  | tyrosine 3-monooxygenase/tryptophan 5-monooxygenase activation protein, zeta polypeptide | protein targeting                                             |
| D30740_g_at                | 1.66E-01    | 0.8  | 5.62E-05     | 1.8  | tyrosine 3-monooxygenase/tryptophan 5-monooxygenase activation protein, zeta polypeptide | protein targeting                                             |
| rc_AA799729_g_at           | 2.90E-01    | 0.7  | 8.38E-06     | 5.4  | cAMP phosphodiesterase 4B                                                                | purine metabolism                                             |
| J04563_at                  | 4.57E-01    | 1.4  | 9.99E-04     | 11.3 | cAMP phosphodiesterase 4B                                                                | purine metabolism                                             |
| M25350_s_at                | 7.05E-02    | 2.1  | 3.80E-04     | 9.0  | cAMP phosphodiesterase 4B                                                                | purine metabolism                                             |
| U12187_at                  | 1.02E-04    | 12.8 | 1.52E-05     | 17.1 | ras-related protein                                                                      | small GTPase mediated signal transduction                     |
| L29232_at                  | 1.04E-01    | 3.6  | 1.22E-05     | 6.8  | insulin-like growth factor 1 receptor                                                    | protein tyrosine kinase signaling pathway                     |



**Table E7.** Expression of biosynthesis, receptor, and extracellular matrix genes in the diaphragm following MV6 and MV18.

| Affymetrix Probe            | MV6/Control |      | MV18/Control |      | Gene                                                               | Description                                      |
|-----------------------------|-------------|------|--------------|------|--------------------------------------------------------------------|--------------------------------------------------|
|                             | p-value     | Fold | p-value      | Fold |                                                                    |                                                  |
| <b>Biosynthesis</b>         |             |      |              |      |                                                                    |                                                  |
| U89905_at                   | 1.72E-01    | -0.5 | 7.86E-04     | -2.1 | alpha-methylacyl-CoA racemase                                      | bile acid synthesis                              |
| X52625_at                   | 9.93E-02    | -0.5 | 9.41E-06     | -1.7 | 3-hydroxy-3-methylglutaryl-Coenzyme A synthase 1                   | cholesterol synthesis                            |
| J03190_g_at                 | 5.18E-02    | -1.4 | 1.68E-04     | -2.6 | 5-aminolevulinic acid synthase                                     | heme synthesis                                   |
| Y00350_at                   | 3.29E-02    | -1.1 | 3.59E-05     | -1.6 | uroporphyrinogen decarboxylase                                     | heme synthesis                                   |
| rc_AI232783_s_at            | 7.32E-03    | 1.5  | 9.13E-04     | 1.6  | glutamine synthetase 1                                             | nitrogen metabolism                              |
| D10354_s_at                 | 6.94E-01    | -0.1 | 2.29E-04     | -1.7 | glutamic-pyruvate transaminase (alanine aminotransferase)          | nitrogen metabolism                              |
| AB000717exons#1-8_s_at      | 3.20E-03    | 1.5  | 3.17E-05     | 2.9  | S-adenosylmethionine synthetase (non-hepatic-type)                 | S-adenosylmethionine synthesis                   |
| D26073_g_at                 | 9.42E-03    | 1.3  | 3.22E-04     | 1.5  | phosphoribosylpyrophosphate synthetase-associated protein (39 kDa) | nucleotide synthesis                             |
| U90888_at                   | 2.89E-01    | 3.1  | 4.35E-04     | 5.3  | adenosine monophosphate deaminase 3                                | purine ribonucleoside monophosphate synthesis    |
| <b>Receptor</b>             |             |      |              |      |                                                                    |                                                  |
| S61973_g_at                 | 1.85E-02    | 1.4  | 1.30E-04     | 1.6  | NMDA receptor glutamate-binding chain                              | cation channel activity                          |
| rc_AI639001_at              | 7.47E-02    | -1.4 | 1.18E-05     | -2.2 | protein tyrosine phosphatase, receptor-type, M                     | protein tyrosine kinase signaling pathway        |
| rc_AI232379_at              | 2.53E-01    | 1.0  | 3.84E-05     | 2.0  | platelet derived growth factor receptor, alpha polypeptide         | protein tyrosine kinase signaling pathway        |
| <b>Extracellular Matrix</b> |             |      |              |      |                                                                    |                                                  |
| rc_AA900848_at              | 2.92E-02    | -1.4 | 5.90E-04     | -1.6 | laminin, beta 2                                                    | cell adhesion                                    |
| AF020046_s_at               | 4.96E-03    | -2.2 | 3.03E-04     | -3.9 | integrin alpha E1, epithelial-associated                           | cell-matrix adhesion                             |
| rc_AI177366_at              | 3.34E-01    | 0.8  | 2.11E-04     | 1.7  | integrin beta 1                                                    | cell-matrix adhesion                             |
| X02918_g_at                 | 1.23E-01    | 0.4  | 6.61E-04     | 1.5  | prolyl 4-hydroxylase, beta polypeptide                             | collagen synthesis                               |
| S77494_s_at                 | 1.53E-01    | 3.3  | 4.81E-04     | 6.7  | lysyl oxidase                                                      | collagen synthesis                               |
| S66184_s_at                 | 1.62E-01    | 7.3  | 8.54E-04     | 22.8 | lysyl oxidase                                                      | collagen synthesis                               |
| rc_AI639233_s_at            | 5.54E-01    | 0.6  | 6.98E-05     | 2.0  | decorin                                                            | extracellular matrix organization and biogenesis |
| M64780_at                   | 9.83E-03    | -1.3 | 1.42E-04     | -1.9 | agrin                                                              | neuromuscular junction formation                 |
| M64780_g_at                 | 4.61E-03    | -1.3 | 8.36E-05     | -1.9 | agrin                                                              | neuromuscular junction formation                 |
| L02896_at                   | 3.24E-01    | -0.4 | 7.90E-05     | -2.0 | glypican 1                                                         | proteoglycan integral to plasma membrane         |
| S61868_at                   | 2.05E-01    | 1.2  | 2.47E-04     | 4.0  | syndecan 4                                                         | skeletal muscle development and regeneration     |
| U75405UTR#1_f_at            | 2.17E-02    | -1.6 | 4.18E-05     | -3.6 | collagen, type 1, alpha 1                                          | structural protein                               |

**Table E8.** Expression of ESTs in the diaphragm following MV6 and MV18.

| Affymetrix Probe | MV6/Control |      | MV18/Control |       | Gene                                                                                                                                                    |
|------------------|-------------|------|--------------|-------|---------------------------------------------------------------------------------------------------------------------------------------------------------|
|                  | p-value     | Fold | p-value      | Fold  |                                                                                                                                                         |
| rc_AI639060_at   | 2.94E-02    | -4.9 | 4.09E-04     | -48.1 | weak similarity to protein ref:NP_060351.1 (H.sapiens) hypothetical protein FLJ20559 [Homo sapiens]                                                     |
| rc_AA799812_g_at | 3.72E-03    | -4.8 | 4.23E-10     | -8.0  | moderate similarity to protein pir:A41109 (H.sapiens) A41109 protein-tyrosine-phosphatase (EC 3.1.3.48), nonreceptor type 3 - human                     |
| rc_AA800202_at   | 3.67E-03    | -2.9 | 3.74E-04     | -2.6  |                                                                                                                                                         |
| rc_AA800298_at   | 4.56E-03    | -2.6 | 9.59E-04     | -2.6  | similar to type XV collagen (LOC298069), mRNA                                                                                                           |
| rc_AA799812_at   | 5.86E-02    | -2.3 | 1.44E-05     | -5.1  | moderate similarity to protein pir:A41109 (H.sapiens) A41109 protein-tyrosine-phosphatase (EC 3.1.3.48), nonreceptor type 3 - human                     |
| rc_AA874873_at   | 6.77E-03    | -1.9 | 1.19E-04     | -3.5  |                                                                                                                                                         |
| rc_AA874873_g_at | 8.80E-04    | -1.9 | 9.19E-06     | -2.5  |                                                                                                                                                         |
| rc_AA891288_g_at | 4.66E-03    | -1.7 | 8.63E-05     | -1.7  |                                                                                                                                                         |
| rc_H31144_g_at   | 2.23E-03    | -1.7 | 2.46E-04     | -2.3  | similar to non-receptor protein tyrosine kinase Ack (LOC303882), mRNA                                                                                   |
| rc_AI639267_at   | 1.52E-01    | -1.5 | 9.29E-05     | -3.2  |                                                                                                                                                         |
| rc_AI639495_at   | 9.31E-04    | -1.5 | 6.43E-07     | -4.2  |                                                                                                                                                         |
| rc_AA800272_at   | 3.17E-04    | -1.5 | 1.98E-03     | -1.9  | similar to mitochondrial ribosomal protein L3 (L3mt) (LOC300974), mRNA                                                                                  |
| rc_H31802_at     | 2.11E-02    | -1.4 | 4.67E-05     | -2.4  | moderate similarity to protein pir:S12207 (M.musculus) S12207 hypothetical protein (B2 element) - mouse                                                 |
| rc_AA874802_s_at | 6.59E-03    | -1.4 | 4.67E-05     | -2.5  |                                                                                                                                                         |
| rc_AA800686_at   | 6.34E-03    | -1.3 | 2.00E-05     | -2.2  | moderate similarity to protein pir:I39175 (H.sapiens) I39175 SH2-domain protein Grb-IR - human                                                          |
| rc_AA799518_at   | 3.56E-02    | -1.3 | 5.13E-04     | -1.8  | similar to mmDj4 (LOC300721), mRNA                                                                                                                      |
| rc_AA875633_at   | 3.35E-02    | -1.3 | 8.66E-06     | -2.0  | similar to polymerase I-transcript release factor; PTRF (LOC287710), mRNA                                                                               |
| rc_AA800184_at   | 1.22E-01    | -1.3 | 1.04E-05     | -2.2  |                                                                                                                                                         |
| rc_AI639268_at   | 4.96E-02    | -1.3 | 1.06E-04     | -2.0  | similar to DKFZP566O084 protein (LOC287411), mRNA                                                                                                       |
| rc_AA892777_at   | 4.43E-02    | -1.3 | 1.13E-04     | -2.3  | similar to Ribonuclease HI large subunit (RNase HI large subunit) (LOC364974), mRNA                                                                     |
| rc_AA860015_at   | 5.17E-03    | -1.2 | 5.16E-04     | -1.8  | similar to KIAA1592 protein (LOC363216), mRNA                                                                                                           |
| rc_AA892570_at   | 6.17E-03    | -1.2 | 8.46E-07     | -2.7  |                                                                                                                                                         |
| rc_AA866299_g_at | 3.97E-02    | -1.2 | 1.81E-04     | -2.0  |                                                                                                                                                         |
| rc_AA799442_at   | 9.43E-02    | -1.2 | 1.41E-05     | -1.8  | hypothetical LOC293114 (LOC293114), mRNA                                                                                                                |
| rc_AA892303_g_at | 1.26E-02    | -1.2 | 1.03E-04     | -1.9  | similar to dynein, axonemal, light chain 4 (LOC294376), mRNA                                                                                            |
| AA848268_at      | 1.16E-01    | -1.2 | 3.02E-04     | -2.4  | similar to mmDj4 (LOC300721), mRNA                                                                                                                      |
| rc_AA799570_at   | 3.93E-02    | -1.2 | 8.23E-05     | -1.7  | similar to mmDj4 (LOC300721), mRNA                                                                                                                      |
| rc_AA875495_at   | 1.43E-03    | -1.1 | 4.71E-04     | -2.1  |                                                                                                                                                         |
| rc_AA891037_at   | 4.61E-02    | -1.1 | 2.37E-04     | -1.8  | similar to 60S ribosomal protein L3-like (LOC287122), mRNA                                                                                              |
| rc_AA866299_at   | 2.05E-02    | -1.1 | 3.12E-04     | -1.9  |                                                                                                                                                         |
| rc_AA799771_at   | 1.87E-02    | -1.1 | 4.46E-05     | -1.9  |                                                                                                                                                         |
| rc_AA799442_g_at | 6.50E-02    | -1.1 | 5.32E-04     | -2.1  | hypothetical LOC293114 (LOC293114), mRNA                                                                                                                |
| rc_AA799607_at   | 1.07E-02    | -1.0 | 6.22E-05     | -1.7  |                                                                                                                                                         |
| rc_AA799829_at   | 1.68E-02    | -1.0 | 4.96E-04     | -1.7  | similar to mitochondrial ATP synthase regulatory component factor B (LOC362749), mRNA                                                                   |
| rc_AA892799_s_at | 2.60E-01    | -1.0 | 5.60E-04     | -2.8  | similar to glyoxylate reductase/hydroxypyruvate reductase (LOC298085), mRNA                                                                             |
| rc_AA891802_at   | 6.92E-02    | -0.9 | 1.82E-05     | -2.6  | strong similarity to protein ref:NP_062269.1 (M.musculus) cysteine and histidine rich 1; cysteine and histidine-rich cytoplasmic protein [Mus musculus] |
| rc_AA892422_at   | 2.76E-01    | -0.9 | 6.49E-04     | -1.8  | similar to mitochondrial ribosomal protein L11 (LOC293666), mRNA                                                                                        |
| rc_H31711_at     | 4.05E-02    | -0.9 | 1.51E-05     | -1.8  | similar to mitochondrial ribosomal protein L44 (LOC301552), mRNA                                                                                        |
| rc_AA891220_at   | 2.20E-01    | -0.9 | 1.68E-04     | -1.6  |                                                                                                                                                         |

**Table E8.** Expression of ESTs in the diaphragm following MV6 and MV18, continued.

| Affymetrix Probe | MV6/Control |      | MV18/Control |      | Gene                                                                                                                                                           |
|------------------|-------------|------|--------------|------|----------------------------------------------------------------------------------------------------------------------------------------------------------------|
|                  | p-value     | Fold | p-value      | Fold |                                                                                                                                                                |
| rc_AA859719_at   | 1.50E-01    | -0.8 | 1.87E-05     | -2.0 | similar to mitochondrial ribosomal protein S14 (LOC289143), mRNA                                                                                               |
| rc_AA891814_at   | 6.37E-02    | -0.8 | 3.50E-05     | -2.8 | similar to RIKEN cDNA 2010001009 (LOC298282), mRNA                                                                                                             |
| rc_H31990_at     | 6.06E-02    | -0.8 | 8.83E-07     | -2.1 |                                                                                                                                                                |
| rc_AA859688_at   | 2.72E-01    | -0.8 | 2.17E-04     | -1.6 | similar to Auh protein (LOC361215), mRNA                                                                                                                       |
| rc_AA859919_at   | 2.63E-01    | -0.8 | 7.68E-05     | -1.7 | similar to chromosome 14 open reading frame 52 (LOC299154), mRNA                                                                                               |
| rc_AA799654_g_at | 1.70E-01    | -0.8 | 1.90E-04     | -1.6 | similar to WD repeat-containing F-box protein FBW5 (LOC362082), mRNA                                                                                           |
| rc_AA799721_g_at | 2.25E-02    | -0.8 | 1.96E-05     | -1.9 | similar to cysteine and histidine-rich protein (LOC315097), mRNA                                                                                               |
| rc_AA874995_at   | 8.19E-02    | -0.7 | 4.80E-04     | -2.2 | similar to BC002216 protein (LOC313771), mRNA                                                                                                                  |
| rc_H33149_at     | 1.96E-02    | -0.7 | 3.27E-05     | -1.5 | similar to RIKEN cDNA 1810047C23 (LOC361151), mRNA                                                                                                             |
| rc_AA892863_at   | 6.75E-02    | -0.7 | 2.45E-05     | -1.7 | similar to mitochondrial carrier homolog 2 (LOC295922), mRNA                                                                                                   |
| rc_AA800243_at   | 2.24E-01    | -0.7 | 8.97E-04     | -2.3 | similar to cell death activator CIDE-A (LOC291541), mRNA                                                                                                       |
| rc_AA891733_at   | 1.76E-01    | -0.7 | 2.36E-06     | -2.5 |                                                                                                                                                                |
| rc_H32977_at     | 4.19E-01    | -0.6 | 2.67E-04     | -1.7 | similar to RIKEN cDNA 2010015J01 (LOC316365), mRNA                                                                                                             |
| rc_A1639499_s_at | 1.90E-01    | -0.6 | 1.61E-05     | -2.4 |                                                                                                                                                                |
| rc_AA859788_at   | 1.57E-01    | -0.6 | 2.05E-06     | -2.1 | similar to mitochondrial ribosomal protein S11 (LOC365291), mRNA                                                                                               |
| rc_AA891171_s_at | 6.72E-01    | -0.6 | 4.00E-05     | -1.8 | similar to RIKEN cDNA 1810004I06 (LOC293130), mRNA                                                                                                             |
| rc_AA892234_at   | 3.47E-01    | -0.5 | 8.52E-04     | -1.8 | similar to microsomal glutathione S-transferase 3 (LOC289197), mRNA                                                                                            |
| rc_AA800216_at   | 8.70E-01    | -0.5 | 3.02E-07     | -2.8 | weak similarity to protein ref:NP_005442.2 (H.sapiens) enigma protein; LIM domain protein [Homo sapiens]                                                       |
| AA684537_at      | 9.63E-01    | -0.5 | 6.25E-05     | -2.1 |                                                                                                                                                                |
| M59814_at        | 2.09E-01    | -0.5 | 3.30E-04     | -2.1 |                                                                                                                                                                |
| rc_AA866383_at   | 6.17E-01    | -0.5 | 7.65E-05     | -2.8 |                                                                                                                                                                |
| rc_AA799472_g_at | 6.55E-01    | -0.4 | 1.72E-04     | -1.7 | similar to RIKEN cDNA 2900091E11 (LOC299707), mRNA                                                                                                             |
| rc_AA891800_g_at | 1.48E-01    | -0.4 | 1.09E-05     | -1.7 | similar to RIKEN cDNA 1110013G13 (LOC310856), mRNA                                                                                                             |
| rc_AA891742_at   | 2.06E-01    | -0.4 | 1.55E-06     | -2.1 | similar to cDNA sequence BC019806 (LOC306270), mRNA                                                                                                            |
| rc_AA892572_at   | 3.98E-01    | -0.4 | 5.61E-05     | -2.0 | similar to RIKEN cDNA D130059P03 gene (LOC312248), mRNA                                                                                                        |
| rc_AA892572_g_at | 4.16E-01    | -0.4 | 4.66E-04     | -1.7 | similar to RIKEN cDNA D130059P03 gene (LOC312248), mRNA                                                                                                        |
| rc_A1232012_at   | 7.88E-01    | -0.4 | 6.96E-05     | -2.0 | similar to Aa2-258 (LOC296658), mRNA                                                                                                                           |
| rc_AA799788_s_at | 2.21E-01    | -0.4 | 6.96E-04     | -1.6 | similar to cell division cycle 34; ubiquitin-conjugating enzyme E2-32 KDA complementing; ubiquitin carrier protein; ubiquitin-protein ligase (LOC299602), mRNA |
| rc_A1639093_at   | 6.21E-01    | -0.4 | 8.49E-04     | -1.7 | moderate similarity to protein pdb:1LBG (E. coli) B Chain B, Lactose Operon Repressor Bound To 21-Base Pair Symmetric Operator Dna, Alpha Carbons Only         |
| rc_AA891785_at   | 2.00E-01    | -0.4 | 1.47E-04     | -1.5 | similar to NADP+-specific isocitrate dehydrogenase (LOC293043), mRNA                                                                                           |
| rc_AA891800_at   | 2.42E-01    | -0.3 | 1.61E-05     | -1.9 | similar to RIKEN cDNA 1110013G13 (LOC310856), mRNA                                                                                                             |
| rc_A1639030_f_at | 9.18E-02    | -0.3 | 1.50E-05     | -1.7 |                                                                                                                                                                |
| rc_AA799888_at   | 4.03E-01    | -0.3 | 3.29E-05     | -1.9 | similar to mitochondrial ribosomal protein L40 (LOC287962), mRNA                                                                                               |
| rc_AA891580_at   | 2.46E-01    | -0.3 | 3.32E-04     | -1.8 | similar to RIKEN cDNA 2010013M14 (LOC291910), mRNA                                                                                                             |
| AA685112_at      | 4.21E-01    | -0.2 | 1.83E-04     | -2.2 | similar to NADH dehydrogenase:ubiquinone Fe-S protein 8 (LOC293652), mRNA                                                                                      |
| rc_A1639381_at   | 2.49E-01    | -0.2 | 4.40E-04     | -1.7 | similar to checkpoint suppressor 1 (LOC314367), mRNA                                                                                                           |
| rc_AA799479_g_at | 8.19E-01    | -0.2 | 2.55E-04     | -1.5 | similar to NADH dehydrogenase:ubiquinone Fe-S protein 8 (LOC293652), mRNA                                                                                      |
| rc_A1104679_s_at | 8.48E-01    | -0.2 | 1.13E-04     | -1.6 | moderate similarity to protein ref:NP_002485.1 (H.sapiens) NADH dehydrogenase (ubiquinone) 1, subcomplex unknown, 1 (6kD, KFYI) [Homo sapiens]                 |
| rc_AA892378_at   | 6.68E-01    | -0.2 | 3.07E-04     | -1.7 | similar to tetratricopeptide repeat domain 11 (LOC288584), mRNA                                                                                                |

**Table E8.** Expression of ESTs in the diaphragm following MV6 and MV18, continued.

| Affymetrix Probe | MV6/Control |      | MV18/Control |      | Gene                                                                                                                                                          |
|------------------|-------------|------|--------------|------|---------------------------------------------------------------------------------------------------------------------------------------------------------------|
|                  | p-value     | Fold | p-value      | Fold |                                                                                                                                                               |
| rc_AA799412_g_at | 8.57E-01    | -0.1 | 7.60E-04     | -1.7 | similar to Steroid hormone receptor ERR1 (Estrogen-related receptor, alpha) (ERR-alpha) (Estrogen receptor-like 1) (LOC293701), mRNA                          |
| rc_AA891396_at   | 4.16E-01    | 0.0  | 6.98E-04     | -1.5 |                                                                                                                                                               |
| rc_AA892789_at   | 8.71E-01    | 0.1  | 3.88E-06     | -2.3 |                                                                                                                                                               |
| rc_AI639422_at   | 6.47E-01    | 0.1  | 1.30E-05     | -1.7 | strong similarity to protein pir:A60424 (H.sapiens) A60424 calsequestrin precursor, fast skeletal muscle - human                                              |
| rc_AI639058_s_at | 3.42E-01    | 0.1  | 4.39E-05     | 2.7  | similar to Nedd4 WW binding protein 4 (LOC311676), mRNA                                                                                                       |
| rc_AA964320_at   | 7.08E-01    | 0.2  | 6.37E-04     | -1.8 | similar to NADH dehydrogenase (ubiquinone) 1 beta subcomplex 8 (LOC293991), mRNA                                                                              |
| rc_AI639108_at   | 2.72E-01    | 0.2  | 7.23E-05     | -2.0 |                                                                                                                                                               |
| rc_AA799724_g_at | 5.29E-01    | 0.2  | 6.74E-05     | 1.5  | similar to hypothetical protein MGC9850 (LOC360762), mRNA                                                                                                     |
| rc_AA799511_g_at | 7.31E-01    | 0.4  | 9.27E-04     | 1.6  | similar to heterogeneous nuclear ribonucleoprotein A2/B1 (LOC362361), mRNA                                                                                    |
| rc_AA892831_s_at | 4.96E-01    | 0.4  | 7.62E-08     | 2.0  | similar to 26S proteasome non-ATPase regulatory subunit 11 (26S proteasome regulatory subunit S9) (26S proteasome regulatory subunit p44.5) (LOC303353), mRNA |
| rc_AI228674_s_at | 4.04E-01    | 0.4  | 6.49E-06     | 1.9  | moderate similarity to protein pdb:2RMA (H.sapiens) S Chain S, Cyclophilin A (E.C.5.2.1.8) Complexed With Cyclosporin A                                       |
| rc_AA891535_at   | 3.93E-01    | 0.7  | 3.33E-04     | 1.7  | similar to hippocampus abundant gene transcript 1; tetracycline transporter-like protein (LOC295398), mRNA                                                    |
| rc_AA818152_f_at | 3.10E-01    | 0.7  | 3.26E-06     | 1.8  |                                                                                                                                                               |
| rc_AA799744_at   | 4.45E-01    | 0.7  | 4.69E-04     | 2.8  | moderate similarity to protein pdb:1JZ5 (E. coli) B Chain B, E. Coli (Lacz) Beta-Galactosidase In Complex With D-Galctopyranosyl-1-On                         |
| rc_AA800576_at   | 5.25E-01    | 0.7  | 9.87E-05     | 1.7  |                                                                                                                                                               |
| rc_AA875205_g_at | 1.84E-01    | 0.8  | 4.17E-06     | 1.7  | similar to D5Wsu45e protein (LOC288516), mRNA                                                                                                                 |
| rc_AA866482_at   | 2.49E-01    | 0.8  | 1.68E-04     | 1.8  | similar to faciogenital dysplasia homolog (LOC363460), mRNA                                                                                                   |
| rc_AA893082_at   | 2.29E-01    | 1.1  | 2.81E-04     | 3.0  |                                                                                                                                                               |
| rc_AA799330_at   | 2.82E-01    | 1.1  | 3.82E-07     | 3.4  | similar to Pelo protein (LOC294754), mRNA                                                                                                                     |
| rc_AA891108_at   | 1.85E-01    | 1.1  | 6.31E-04     | 1.6  |                                                                                                                                                               |
| rc_AA860049_at   | 7.64E-02    | 1.2  | 4.35E-04     | 1.9  | strong similarity to protein sp:P00722 (E. coli) BGAL_ECOLI Beta-galactosidase (Lactase)                                                                      |
| rc_AA892042_at   | 8.57E-03    | 1.2  | 3.15E-05     | 1.9  | similar to RNA helicase (LOC317335), mRNA                                                                                                                     |
| rc_AA800199_at   | 4.53E-02    | 1.2  | 5.44E-04     | 2.0  | similar to RIKEN cDNA 1110020C13 (LOC363004), mRNA                                                                                                            |
| rc_AA875438_at   | 1.64E-02    | 1.2  | 6.77E-04     | 1.5  |                                                                                                                                                               |
| rc_AA859585_at   | 5.86E-02    | 1.2  | 5.45E-06     | 2.1  | hypothetical LOC302941 (LOC302941), mRNA                                                                                                                      |
| rc_AA799803_at   | 2.27E-01    | 1.3  | 1.17E-04     | 2.6  | similar to complement component 1, r subcomponent (LOC312705), mRNA                                                                                           |
| rc_AA859954_at   | 2.51E-01    | 1.3  | 3.33E-04     | 3.3  |                                                                                                                                                               |
| rc_AI180108_at   | 1.74E-02    | 1.4  | 6.84E-04     | 1.5  | similar to Wbscr1 (LOC288599), mRNA                                                                                                                           |
| rc_AA891821_at   | 4.11E-02    | 1.4  | 1.19E-04     | 1.9  | Unknown (protein for MGC:72616)                                                                                                                               |
| rc_AA893860_at   | 3.40E-02    | 1.4  | 4.12E-05     | 2.1  | similar to hypothetical protein D15Wsu59e (LOC294810), mRNA                                                                                                   |
| rc_AI639277_at   | 7.63E-03    | 1.5  | 8.22E-05     | 2.1  |                                                                                                                                                               |
| rc_AA800245_at   | 8.92E-03    | 1.5  | 4.66E-04     | 1.7  | similar to RING-finger protein MURF (LOC362708), mRNA                                                                                                         |
| rc_AA894188_at   | 1.31E-01    | 1.6  | 1.19E-05     | 3.0  | moderate similarity to protein sp:P00722 (E. coli) BGAL_ECOLI Beta-galactosidase (Lactase)                                                                    |
| U21719mRNA_s_at  | 6.82E-02    | 1.6  | 2.63E-06     | 3.1  | similar to Nucleolar RNA helicase II (Nucleolar RNA helicase Gu) (RH II/Gu) (DEAD-box protein 21) (LOC317399), mRNA                                           |
| rc_AA859633_g_at | 2.66E-03    | 1.7  | 1.21E-04     | 2.1  | similar to PD2 protein (LOC361531), mRNA                                                                                                                      |
| AF069782_at      | 3.14E-02    | 1.9  | 4.27E-06     | 3.9  |                                                                                                                                                               |
| rc_AI237535_s_at | 5.88E-02    | 1.9  | 2.57E-04     | 3.2  |                                                                                                                                                               |
| rc_AA875126_at   | 5.15E-02    | 2.6  | 5.23E-06     | 7.2  | similar to Myosin Id (Myosin heavy chain myr 4) (LOC289785), mRNA                                                                                             |
| rc_AA892333_at   | 5.65E-02    | 2.7  | 2.04E-04     | 6.0  | similar to tubulin, alpha 6; tubulin alpha 6 (LOC300218), mRNA                                                                                                |
| rc_AI176456_at   | 8.83E-05    | 35.1 | 5.01E-05     | 41.0 | moderate similarity to protein sp:P04732 (H.sapiens) MT1E_HUMAN METALLOTHIONEIN-IE (MT-1E)                                                                    |
